# Supplementary material
Source: PubMed Central journal article supplement (PMC3431591)

## **Supplemental Material to:**

**Martín P, Enrique N, Palomo AR, Rebolledo A, Milesi V.**

**Bupivacaine inhibits large conductance, voltage- and  
Ca<sup>2+</sup>- activated K<sup>+</sup> channels in human umbilical artery  
smooth muscle cells**

**Channels 2012; 6 (3)**

**<http://dx.doi.org/10.4161/chan.20362>**

**<http://www.landesbioscience.com/journals/channels/article/20362/>**

**Supplementary Figure 1:** *Characterization of high-conductance voltage- and Ca<sup>2+</sup>-activated K<sup>+</sup> channels (BK<sub>Ca</sub>) in human umbilical artery smooth muscle cells in the inside-out (IO) single-channel configuration.* **A:** Typical recording of BK<sub>Ca</sub> channel activity in an IO patch clamped at +40 mV at a low (3 nM) and a high (1.2 μM) Ca<sup>2+</sup> concentration in contact with the cytosolic face of the membrane. The closed and open levels are indicated as C and O, respectively. **B:** Typical IV curves of BK<sub>Ca</sub> channel in IO configuration obtained with a control pipette solution (containing 140 mM KCl) and three bath solutions in contact with the cytosolic face of the membrane: control bath solution (with 140 mM KCl), bath solution in which KCl was replaced equimolarly by CsCl, and bath solution in which KCl was replaced equimolarly by choline chloride. **C:** Typical plots of open probability (NPo) versus voltage for BK<sub>Ca</sub> channel in IO configuration obtained at a low (3 nM) and a high (1.2 μM) Ca<sup>2+</sup> concentration in contact with the cytosolic face of the membrane. **D:** Mean IV curve for BK<sub>Ca</sub> channel in IO configuration under control conditions. Data represent the mean ± SEM of 3-14 membrane patches. **E:** Typical recording of the block by 500 nM paxilline of the BK<sub>Ca</sub> channel in an IO patch clamped at +60 mV.

# Figure S1

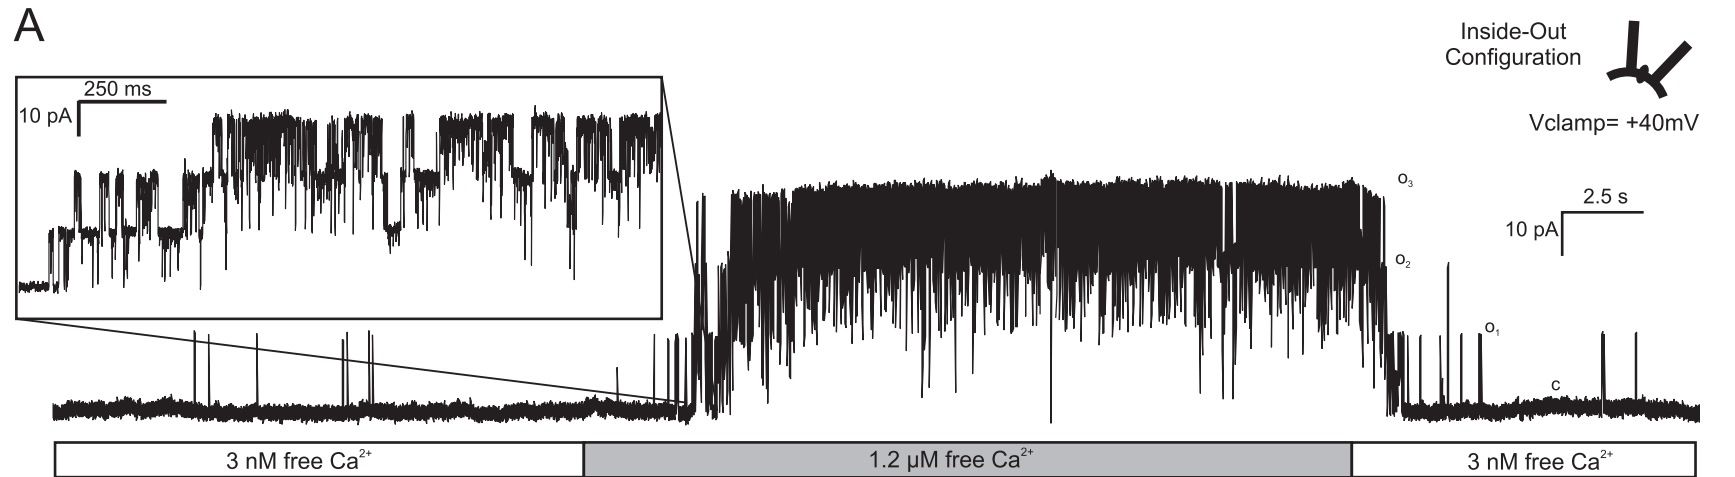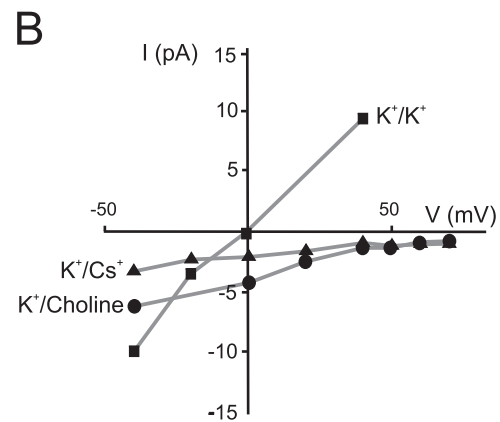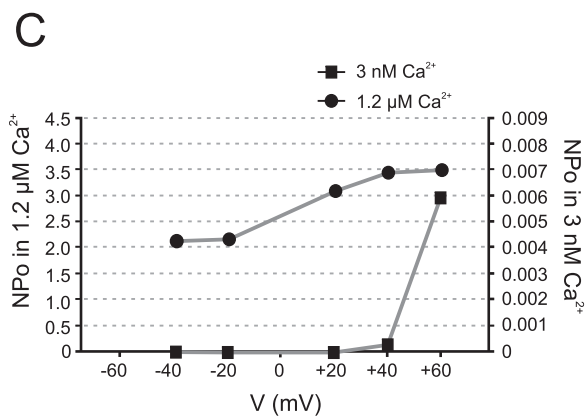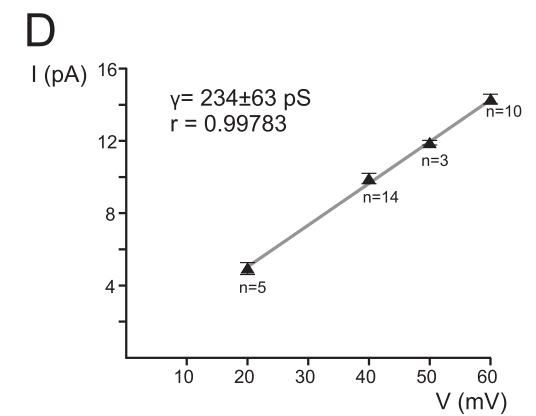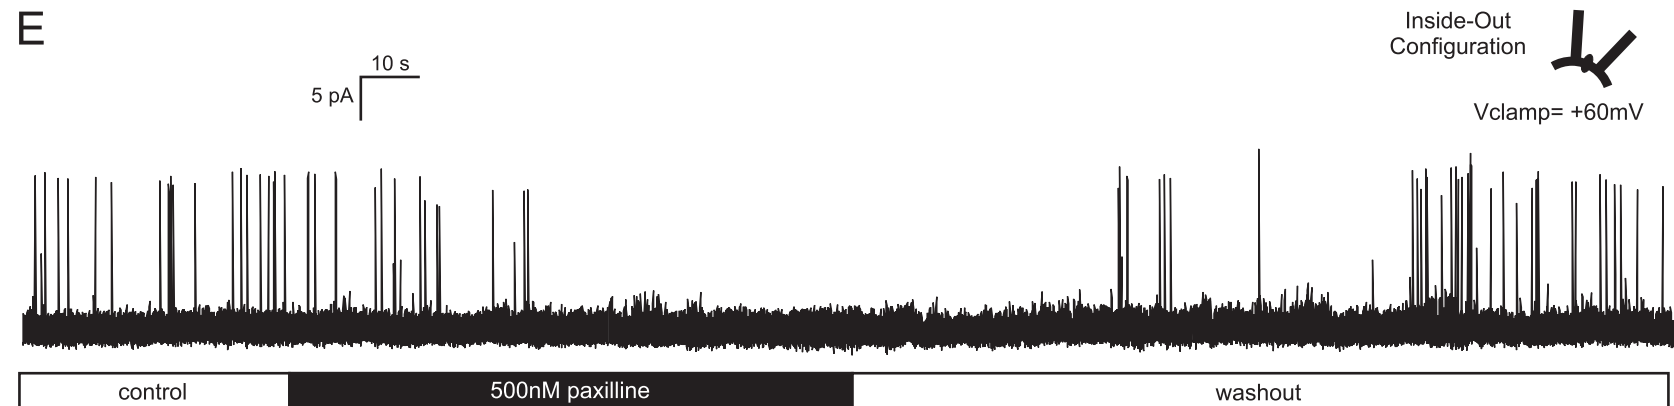

**Supplementary Figure 2:** *Bupivacaine induces a decrease in the amplitude of single-channel current and a flickery mode of the open channel state.* **A:** Typical recording of bupivacaine (300  $\mu\text{M}$ ) effects on  $\text{BK}_{\text{Ca}}$  channel activity in an IO patch clamped at +40 mV with 1.2  $\mu\text{M}$   $\text{Ca}^{2+}$  in contact with the cytosolic face of the membrane. The closed and open levels are indicated as C and O, respectively. **B:** Mean current amplitude of  $\text{BK}_{\text{Ca}}$  channels recorded as shown in A in control (1.2  $\mu\text{M}$   $\text{Ca}^{2+}$ ) and with 300  $\mu\text{M}$  bupivacaine (n=6). The symbol \* indicates a statistically significant difference from controls (Student's t test,  $P < 0.05$ ).

# Figure S2

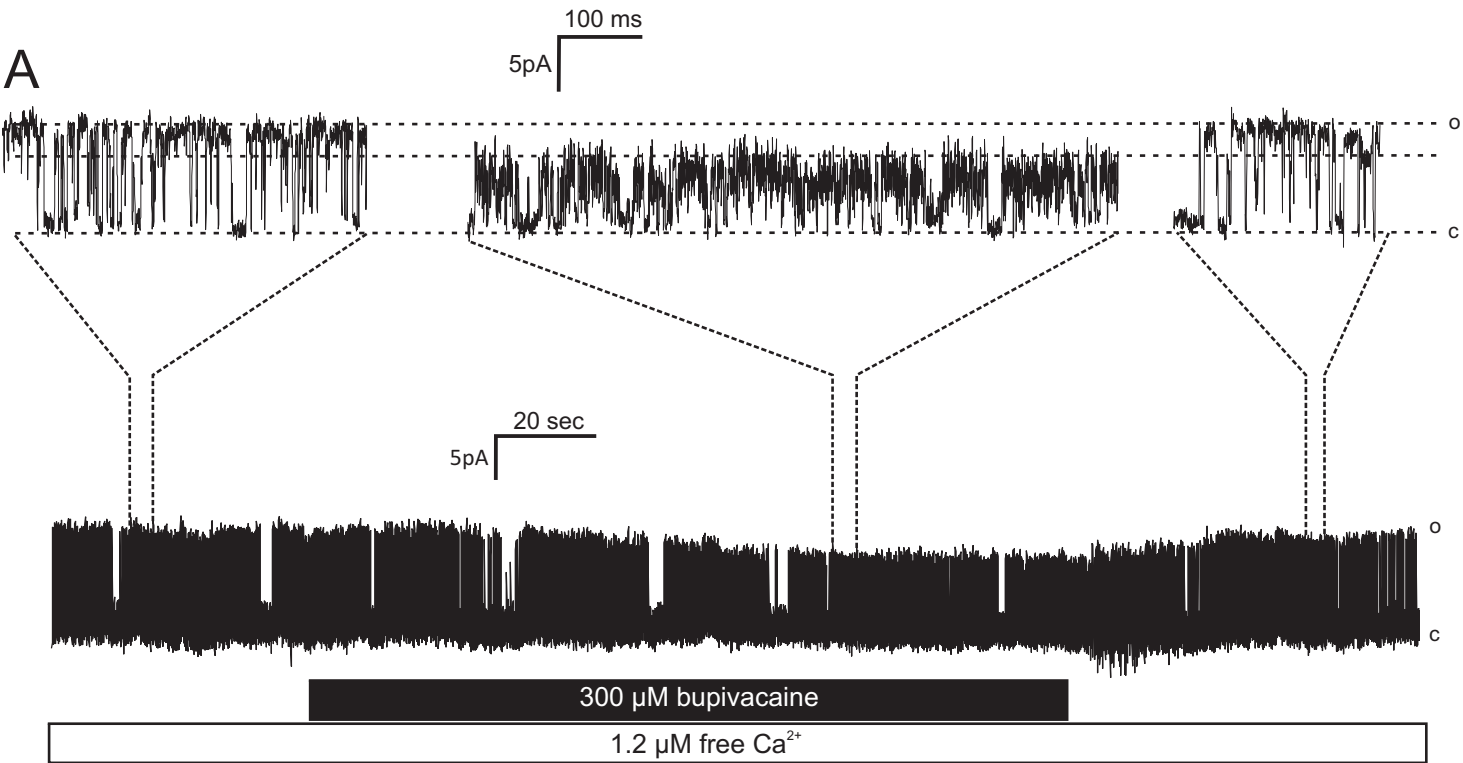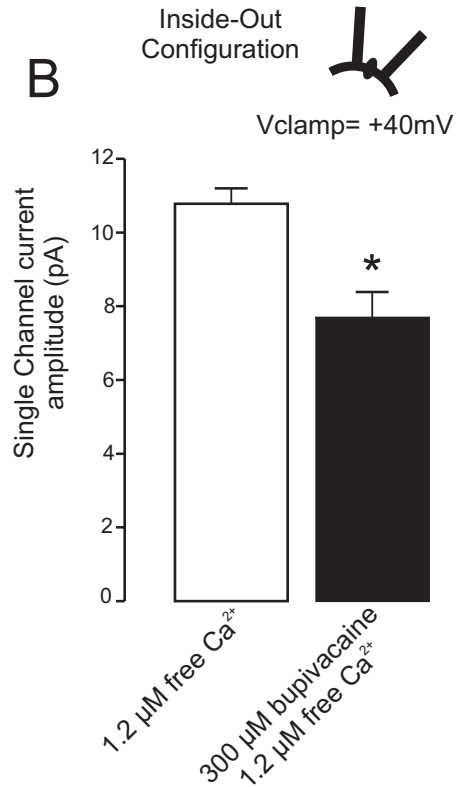

**Supplementary Figure 3:** Temporal course of reduction in open channel current amplitude produced by increasing concentrations of bupivacaine obtained in a typical IO patch clamped at +60 mV.

# Figure S3

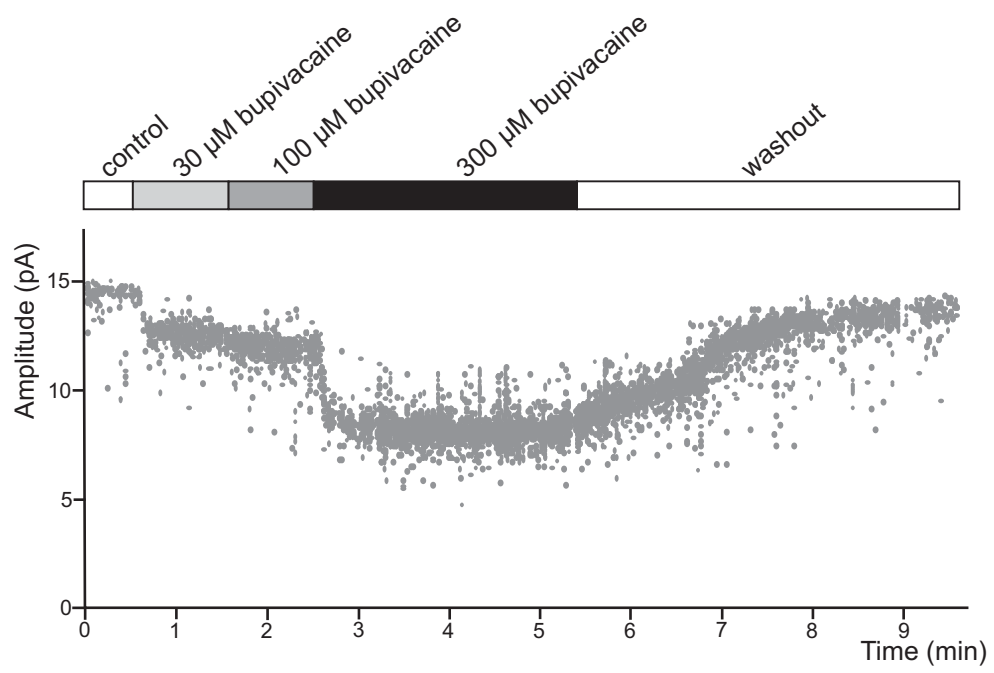

Supplement: chan-6-174-s01.pdf [file chan-6-174-s01.pdf]
